# Supplementary material for: Achieving high energy density for lithium-ion battery anodes by Si/C nanostructure design
Source: Royal Society of Chemistry journal article supplement (doi:10.1039/c8ta10936b), 2018-12-20
Supplement: c8ta10936b1.pdf [file c8ta10936b1.pdf]

## Supporting Information (SI)

### **Achieving high energy density for lithium-ion battery anodes by Si/C nanostructures design**

Xingshuai Lv, Wei Wei\*, Baibiao Huang and Ying Dai\*

School of Physics, State Key Laboratory of Crystal Materials, Shandong University,  
250100 Jinan, China

\* Corresponding authors

[weiw@sdu.edu.cn](mailto:weiw@sdu.edu.cn) (W. Wei)

[daiy60@sdu.edu.cn](mailto:daiy60@sdu.edu.cn) (Y. Dai)

## Contents

1. Geometric structures and possible adsorption sites of (a)  $g\text{-SiC}_2$  and (b)  $g\text{-SiC}_3$ .
2. Three high-symmetry Li adsorption sites on  $g\text{-SiC}_2$  and corresponding charge difference.
3. Three high-symmetry Li adsorption sites on  $g\text{-SiC}_3$  and corresponding charge difference.
4. The most stable configurations at different  $n$  ( $n = 1, 2, 3, 4$  and  $5$ ) values of  $\text{Li}_n\text{Si}_2\text{C}_4$ .
5. The most stable configurations at different  $n$  ( $n = 2, 4, 6, 8$  and  $10$ ) values of  $\text{Li}_n\text{Si}_2\text{C}_6$ .
6. Thermal stability of  $\text{Li}_5\text{Si}_2\text{C}_4$  and  $\text{Li}_{10}\text{Si}_2\text{C}_6$ .
7. PDOS of Li adsorption on graphene,  $g\text{-SiC}_2$  and  $g\text{-SiC}_3$ .
8. Band structures of different lithiated  $g\text{-SiC}_2$ .
9. Band structures of different lithiated  $g\text{-SiC}_3$ .

**Table S1** Comparison of lattice constants of  $g\text{-SiC}_2$  and  $g\text{-SiC}_3$  with previous theoretical results. “–” represents that there is no corresponding result for  $g\text{-SiC}_2$  or  $g\text{-SiC}_3$ . The unit is Å.

|                  | This work | Ref. 35 | Ref. 36 |
|------------------|-----------|---------|---------|
| $g\text{-SiC}_2$ | 5.02      | 5.019   | –       |
| $g\text{-SiC}_3$ | 5.62      | –       | 5.633   |

**Table S2** Adsorption energies on various possible adsorption sites. The most stable adsorption sites are highlighted in red. For C1 sites of  $g\text{-SiC}_2$  and  $g\text{-SiC}_3$ , Li atoms will move to C2 and H1 sites after the optimization, respectively. The unit is eV.

|                  | C1         | C2    | Si    | H     | H1    | H2    |
|------------------|------------|-------|-------|-------|-------|-------|
| $g\text{-SiC}_2$ | -1.71 (C2) | -1.71 | -1.25 | -2.14 | –     | –     |
| $g\text{-SiC}_3$ | -2.24 (H1) | –     | -1.54 | –     | -2.24 | -1.95 |

**Table S3** Adsorption energies at different Li coverages. The unit is eV.

|                  | 1×1   | 2×1   | 2×2   | 3×2   | 3×3   |
|------------------|-------|-------|-------|-------|-------|
| $g\text{-SiC}_2$ | -2.14 | -2.21 | -2.25 | -2.27 | -2.28 |
| $g\text{-SiC}_3$ | -2.24 | -2.28 | -2.33 | -2.35 | -2.35 |

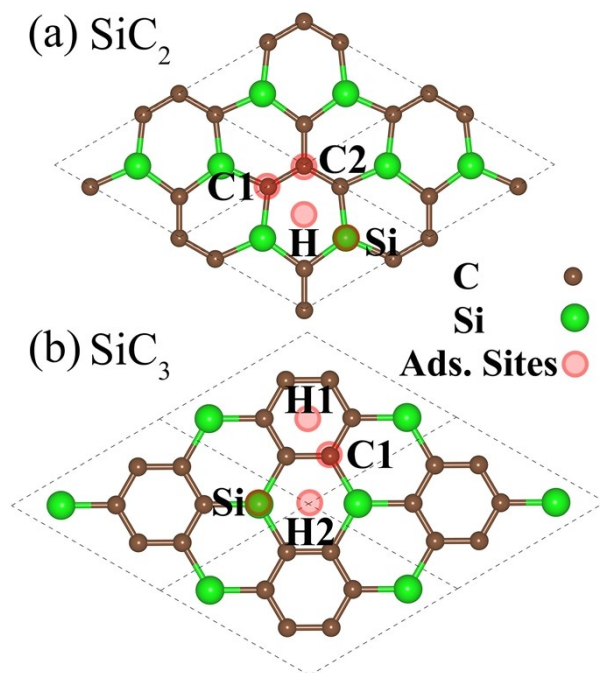

**Figure S1** Schematic representations of the  $(2 \times 2)$  supercells of (a)  $g\text{-SiC}_2$  and (b)  $g\text{-SiC}_3$ . Small (Brown) and large (green) balls represent carbon and Si atoms, respectively.

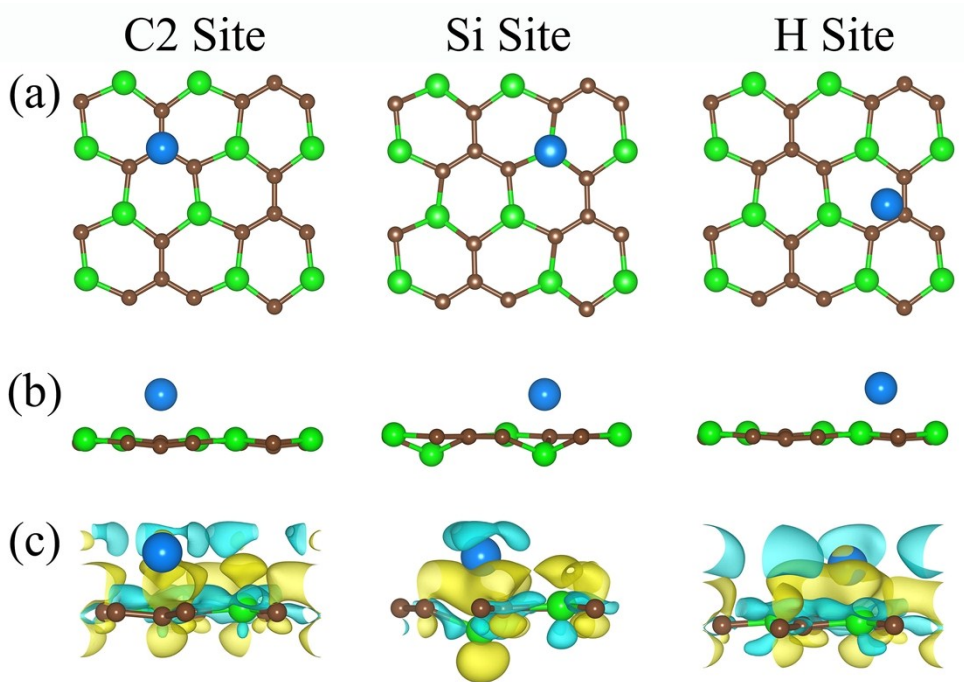

**Figure S2** (a) Top and (b) side views of three high-symmetry Li adsorption sites (C2, Si and H sites) on g-SiC<sub>2</sub>. (c) Corresponding difference charge density. The yellow and blue areas represent electron gains and losses. The difference charge density ( $\Delta\rho$ ) is calculated by  $\Delta\rho = \rho_{total} - \rho_{SG} - \rho_{Li}$ , where  $\rho_{total}$ ,  $\rho_{SG}$  and  $\rho_{Li}$  are the total charge of the system, siligraphene and lithium atom, respectively.

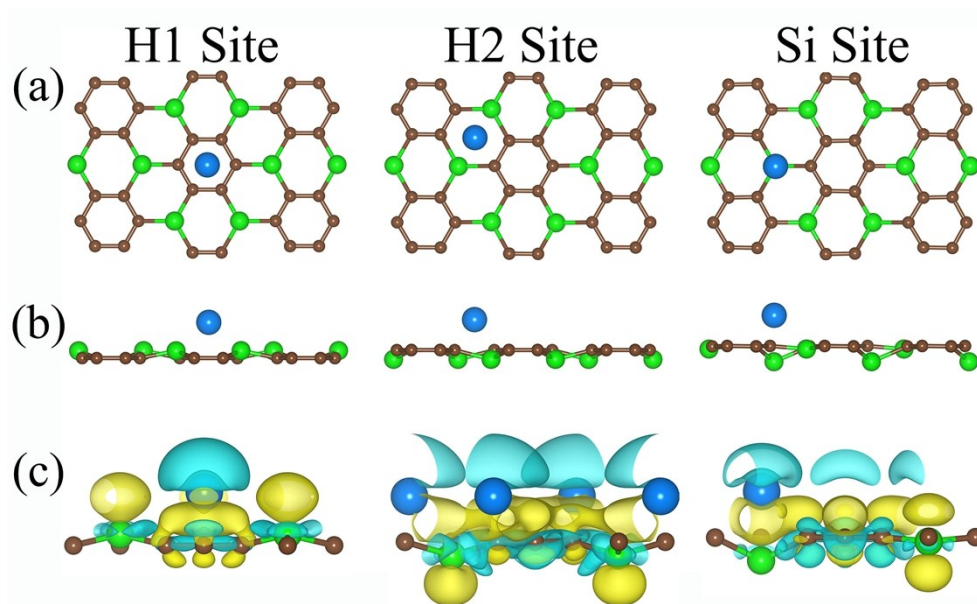

**Figure S3** (a) Top and (b) side views of three high-symmetry Li adsorption sites (C2, Si and H sites) on  $g\text{-SiC}_3$ . (c) Corresponding difference charge density.

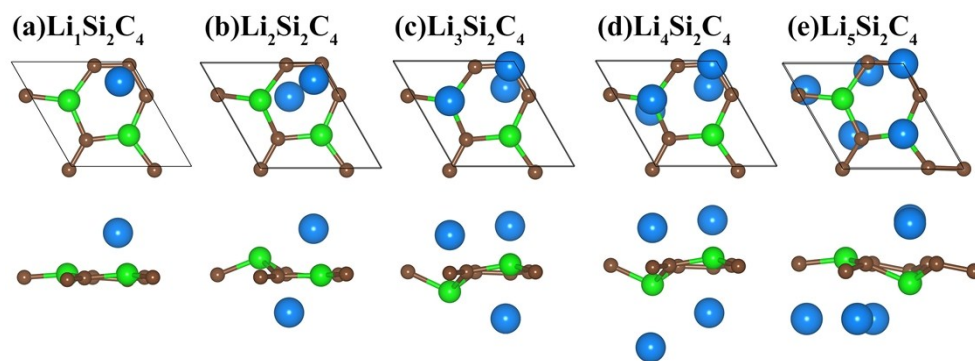

**Figure S4** The most stable configurations of different  $n$  ( $n = 1, 2, 3, 4$  and  $5$ ) of  $\text{Li}_n\text{Si}_2\text{C}_4$ .

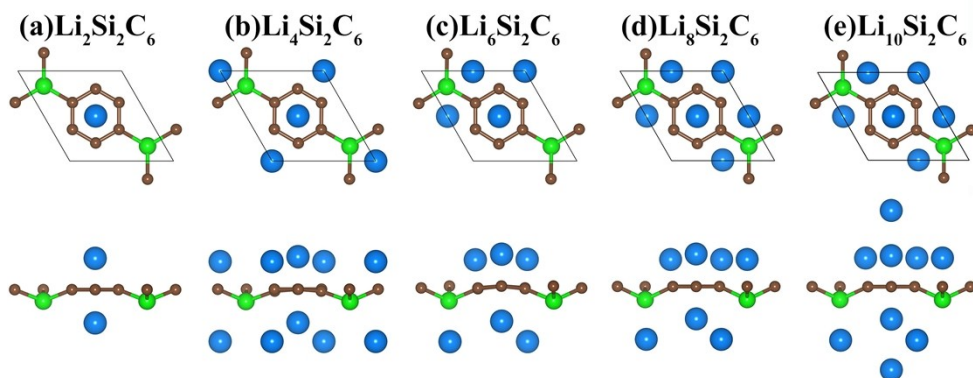

**Figure S5** The most stable configurations of different  $n$  ( $n = 2, 4, 6, 8$  and  $10$ ) of  $\text{Li}_x\text{Si}_2\text{C}_6$ .

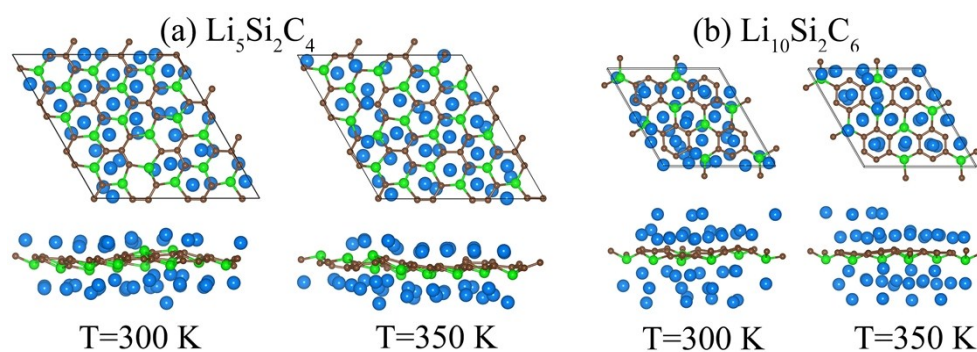

**Figure S6** Snapshots of the final configurations of (a)  $\text{Li}_5\text{Si}_2\text{C}_4$  and (b)  $\text{Li}_{10}\text{Si}_2\text{C}_6$  at temperatures of 300 and 350 K at the end of 10 ps AIMD simulations.

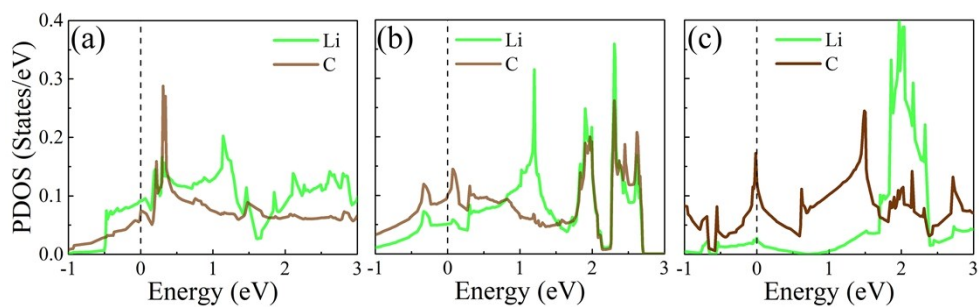

**Figure S7** Projected density of states (PDOS) of Li adsorption on (a) graphene, (b) *g*-SiC<sub>2</sub> and (c) *g*-SiC<sub>3</sub>. The Fermi level is set to zero.

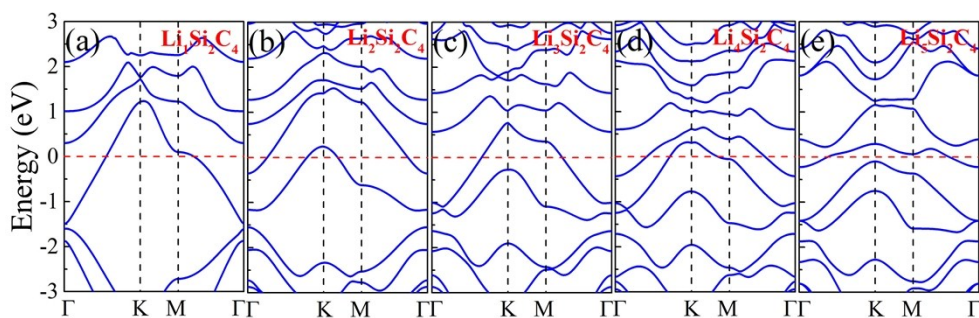

**Figure S8** Band structures of (a) Li<sub>1</sub>Si<sub>2</sub>C<sub>4</sub>, (b) Li<sub>2</sub>Si<sub>2</sub>C<sub>4</sub>, (c) Li<sub>3</sub>Si<sub>2</sub>C<sub>4</sub>, (d) Li<sub>4</sub>Si<sub>2</sub>C<sub>4</sub> and (e) Li<sub>5</sub>Si<sub>2</sub>C<sub>4</sub>, respectively. The Fermi level is set to zero.



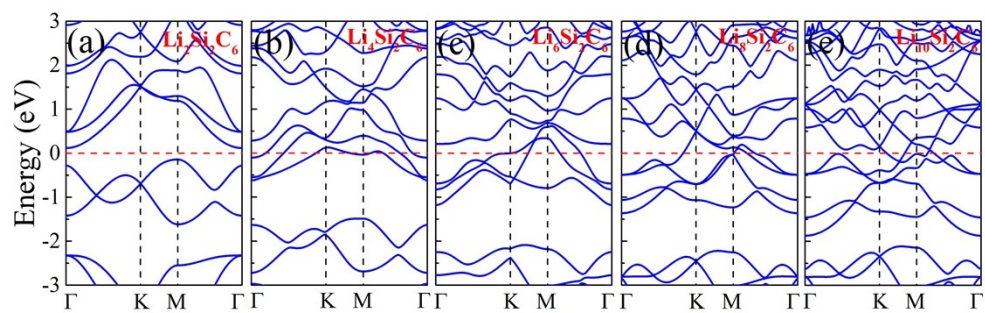

**Figure S9** Band structures of (a)  $\text{Li}_2\text{Si}_2\text{C}_6$ , (b)  $\text{Li}_4\text{Si}_2\text{C}_6$ , (c)  $\text{Li}_6\text{Si}_2\text{C}_6$ , (d)  $\text{Li}_8\text{Si}_2\text{C}_6$  and (e)  $\text{Li}_{10}\text{Si}_2\text{C}_6$ , respectively. The Fermi level is set to zero.
